# Supplementary material for: Deactivation mechanism of SO2 on Cu/SAPO-34 NH3-SCR catalysts: structure and active Cu2+
Source: Royal Society of Chemistry journal article supplement (doi:10.1039/c4cy01129e), 2014-12-08
Supplement: c4cy01129e1.pdf [file c4cy01129e1.pdf]

## Supporting information

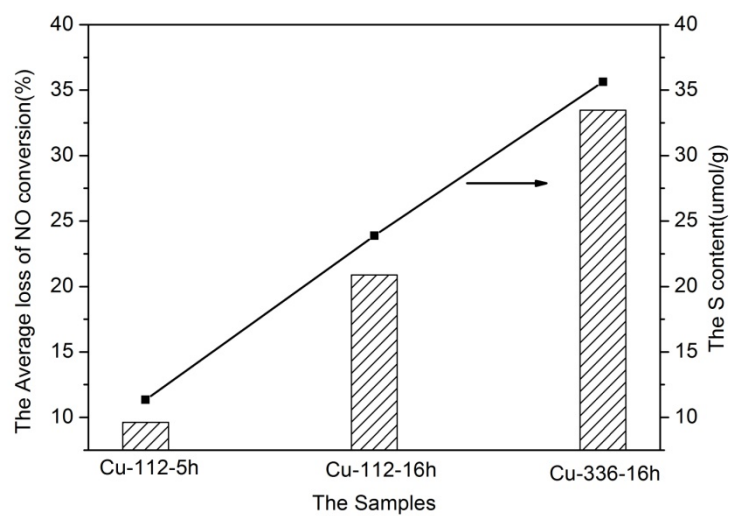

Fig.S1 The relationship between S content and average loss of NO conversion over  $\text{SO}_2$  poisoned Cu/SAPO-34

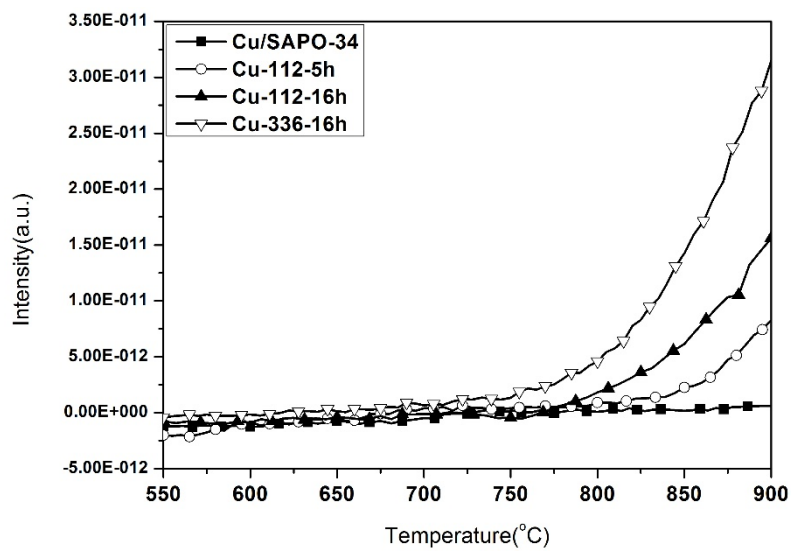

Fig.S2 The partial pressure of H<sub>2</sub>S for fresh and SO<sub>2</sub> poisoned samples by mass spectrometer (HIDEN HPR20)

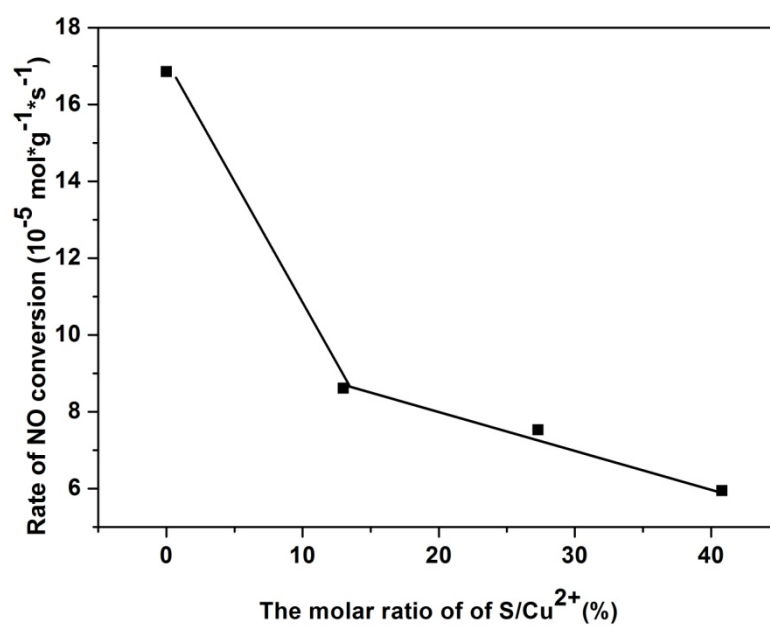

Fig. S3 The relationship between the molar ratio of S/Cu<sup>2+</sup> and the rate of NO conversion over the SO<sub>2</sub> poisoned samples
